# Supplementary material
Source: publisher figshare collection journal article supplement (https://tandf.figshare.com/ndownloader/files/13209005)

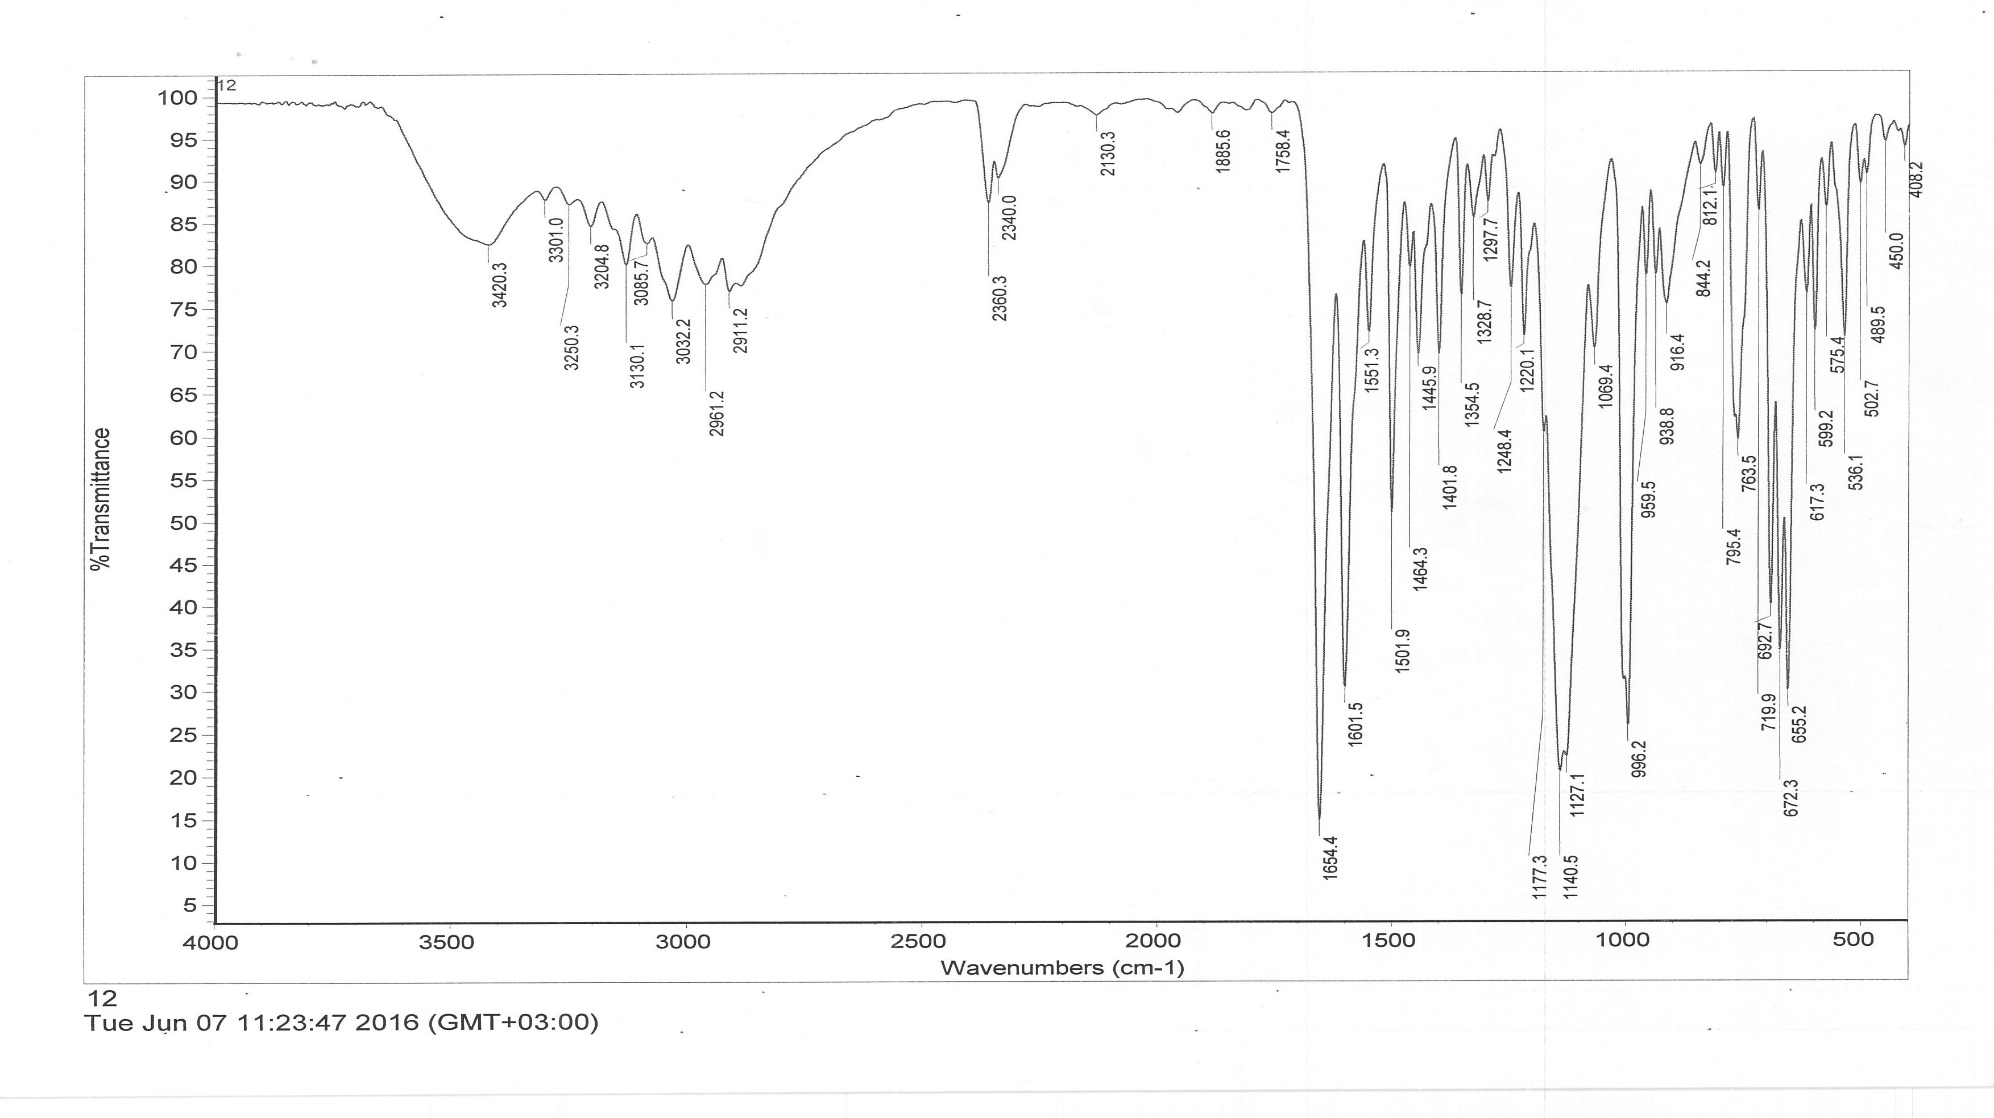


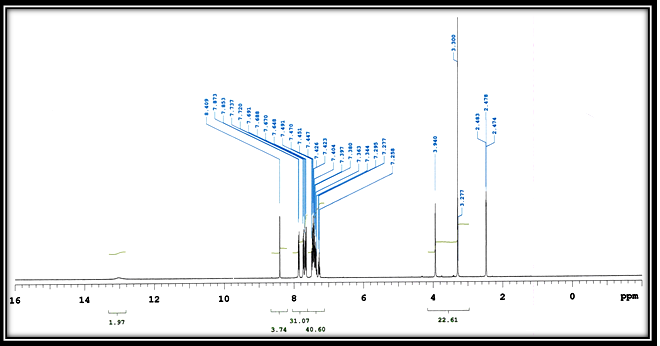


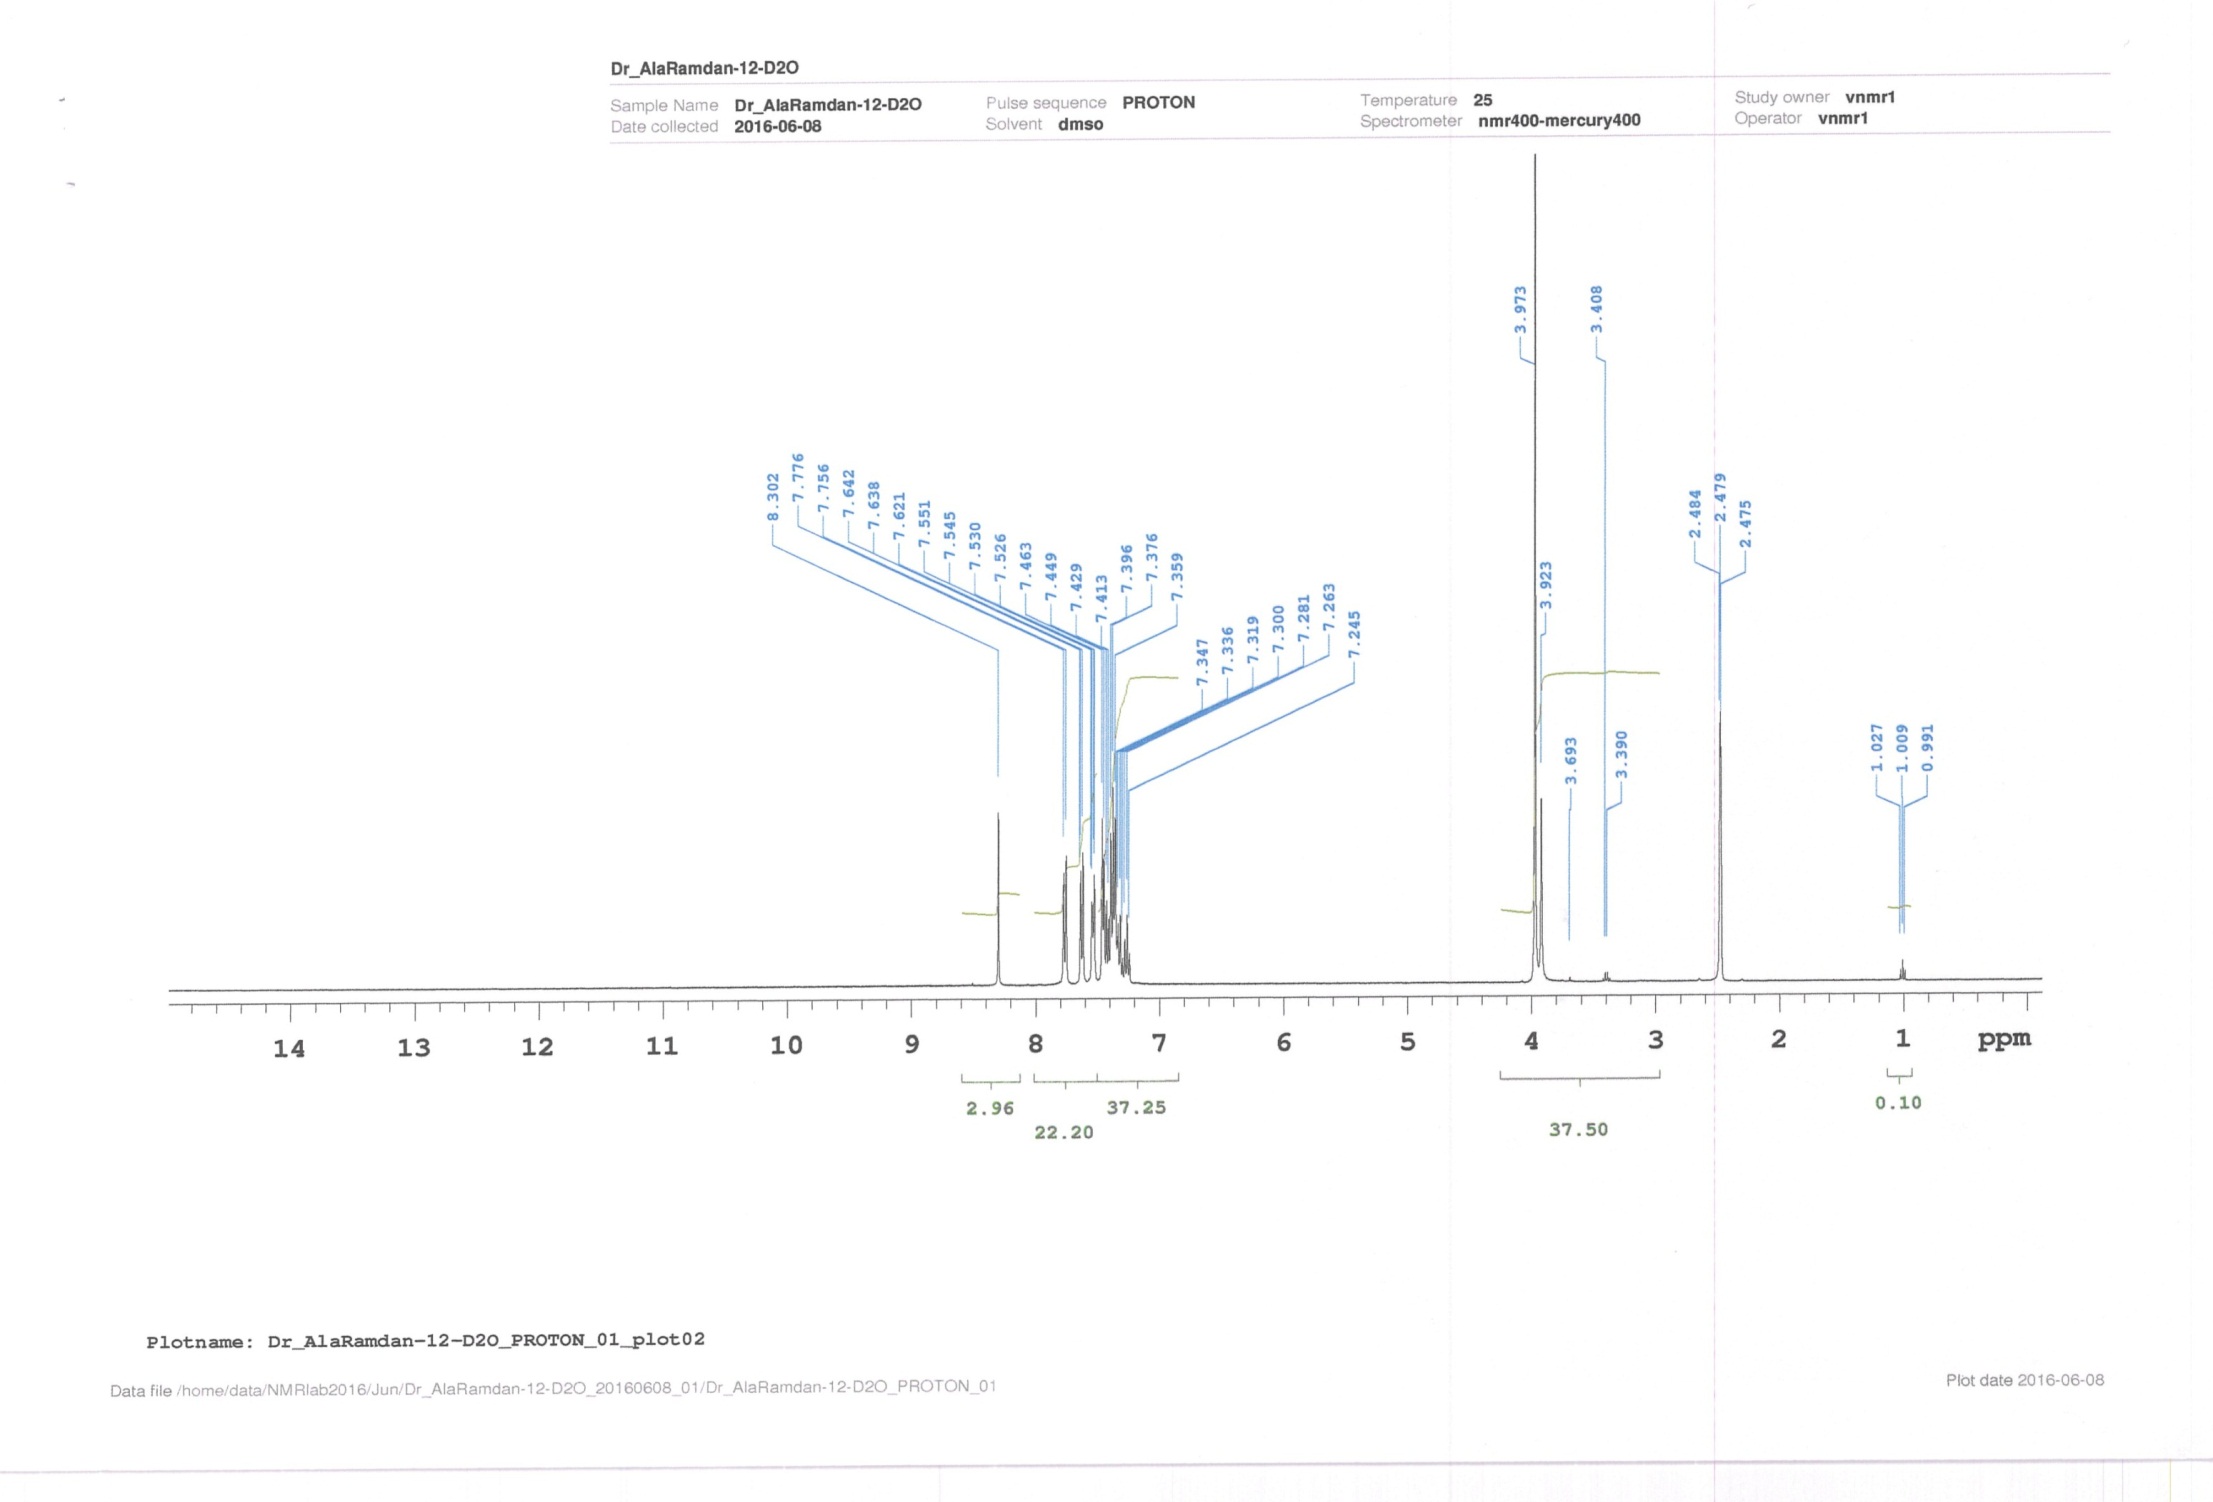


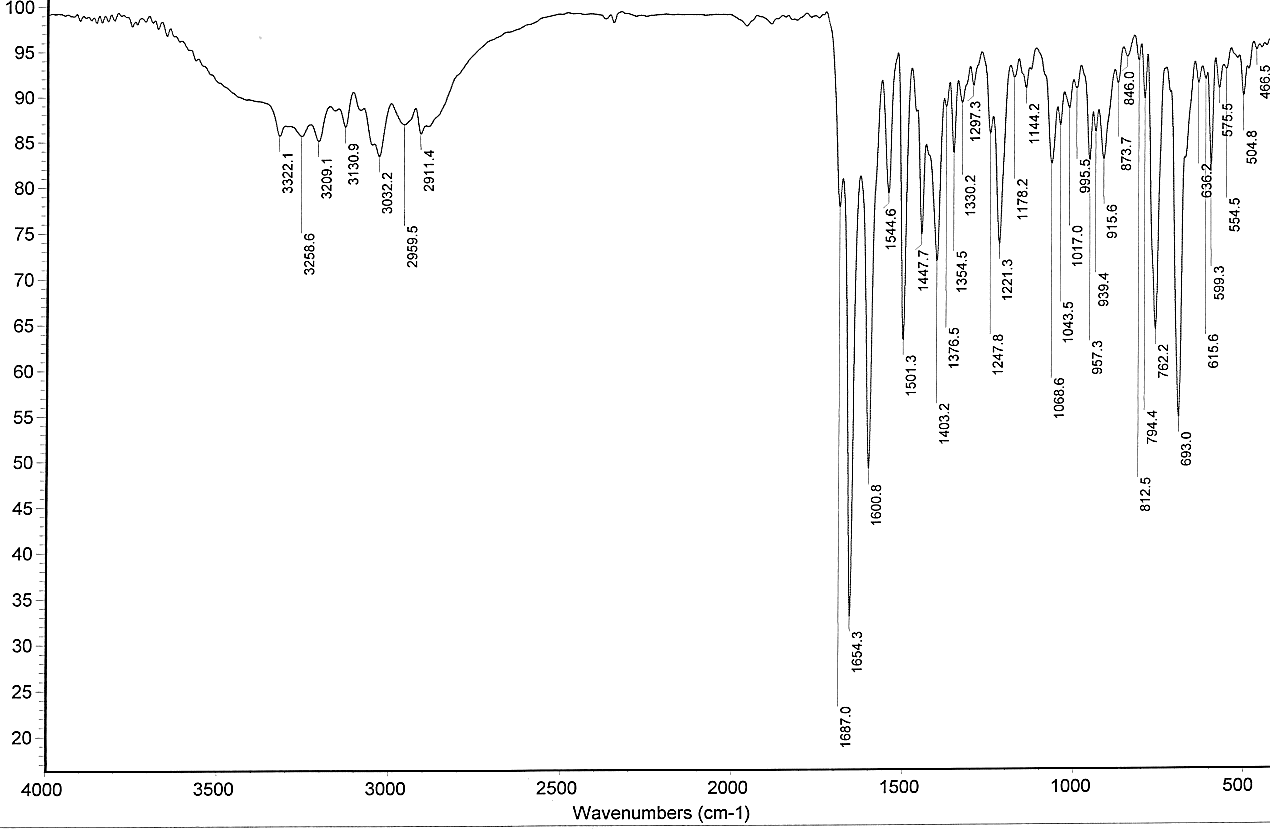


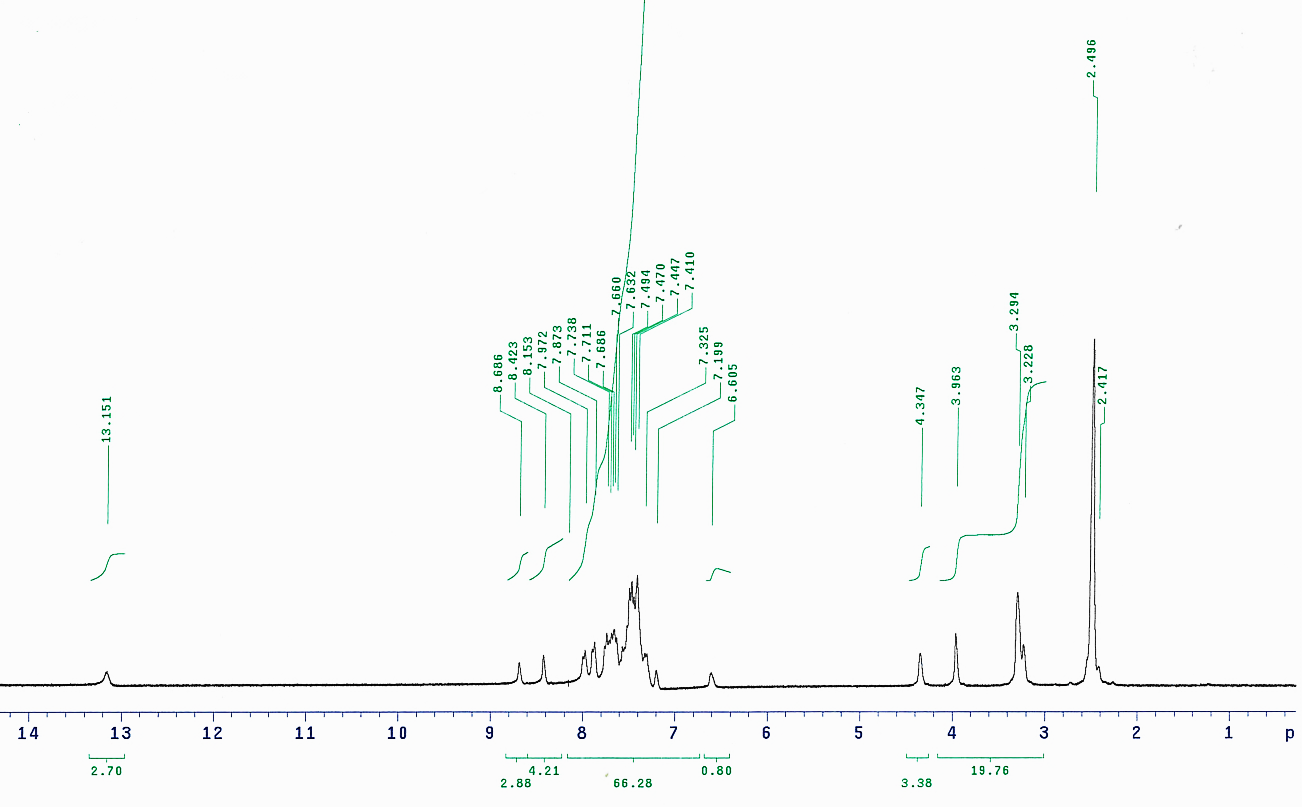


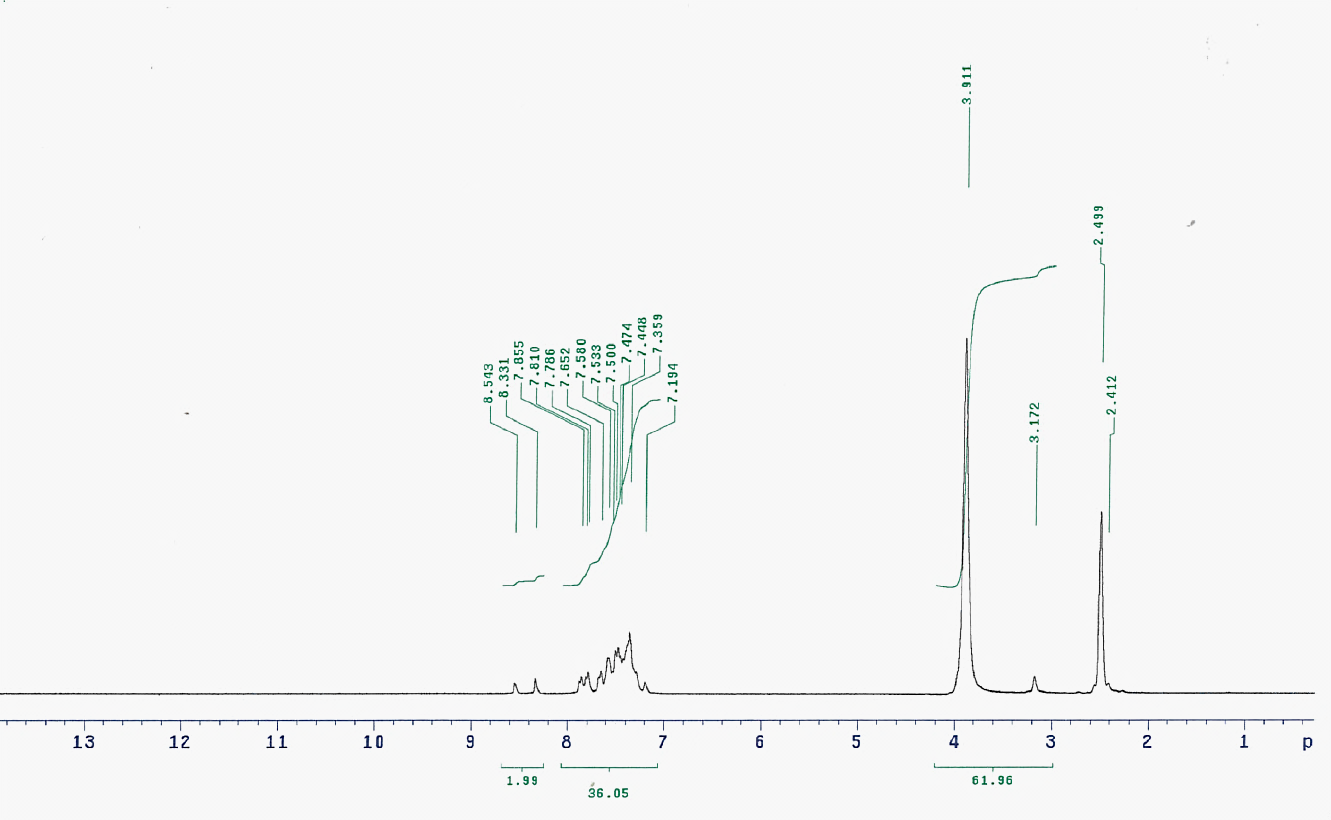


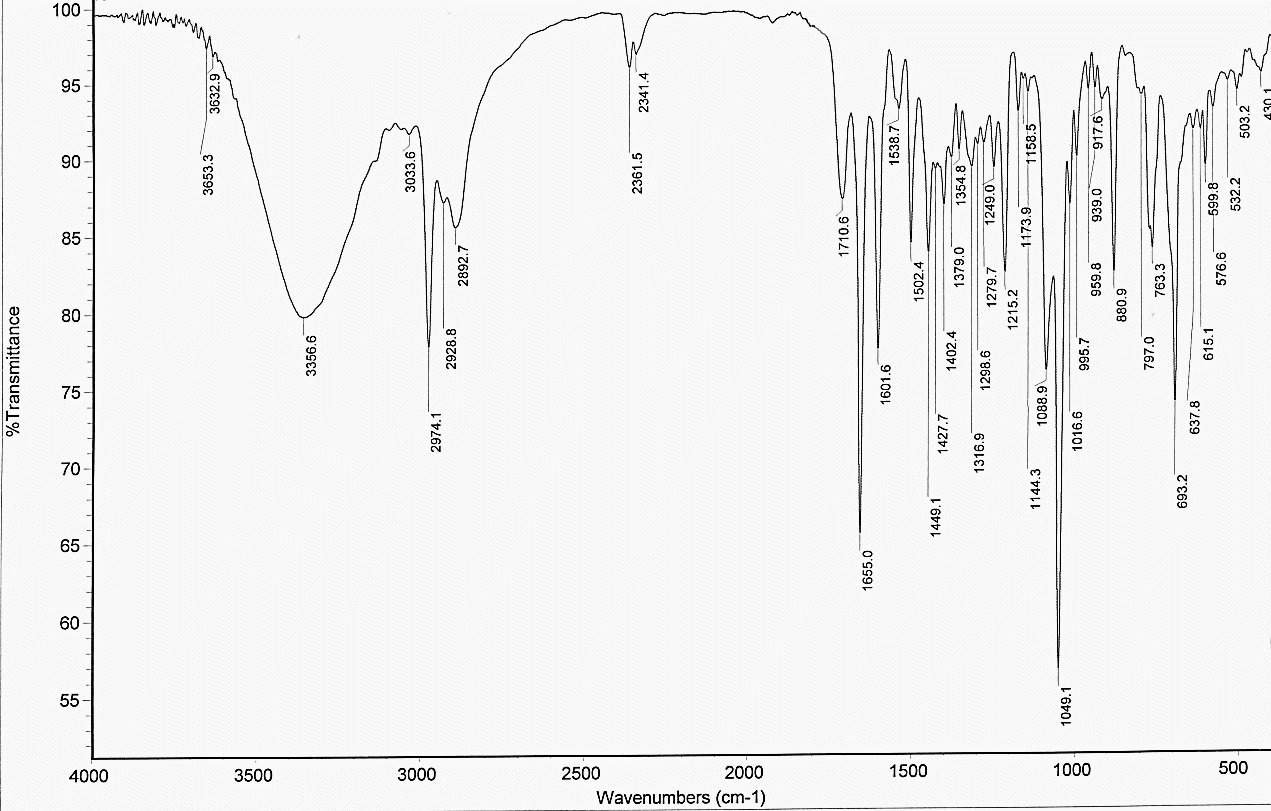


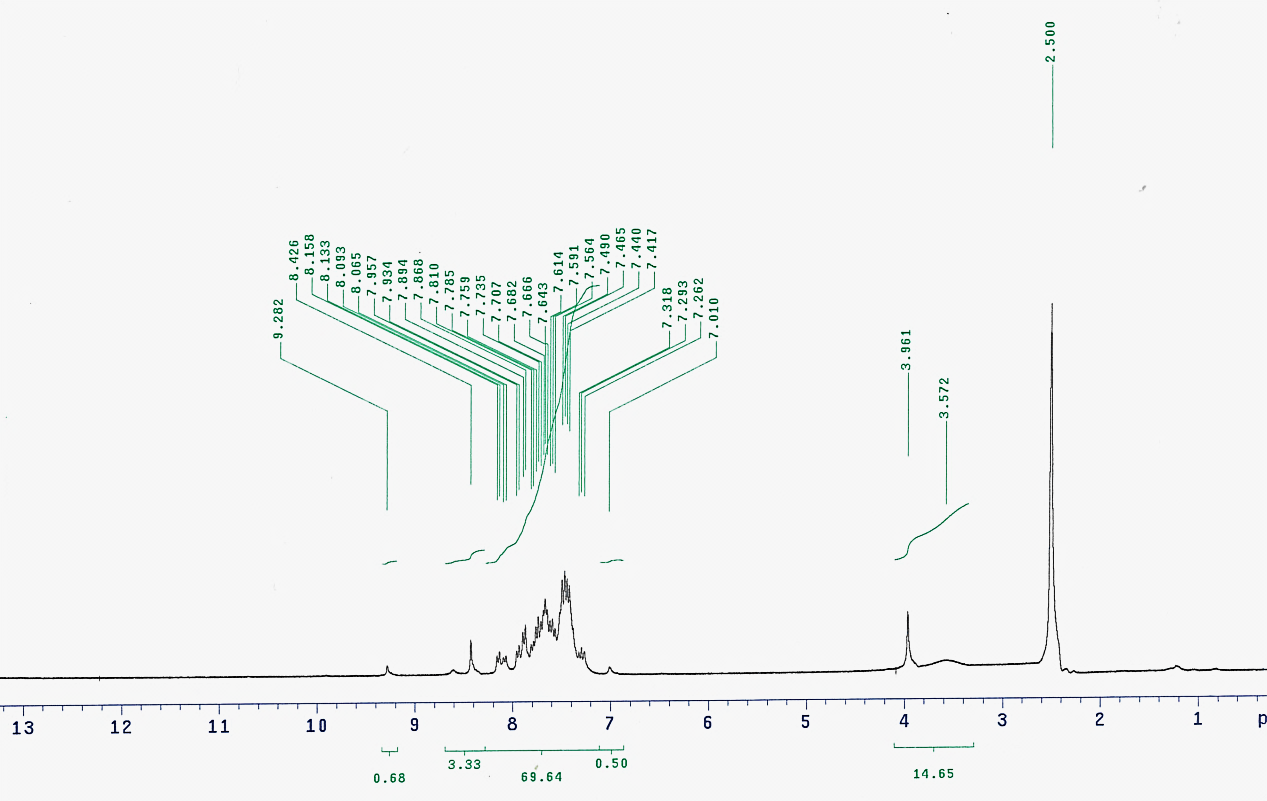


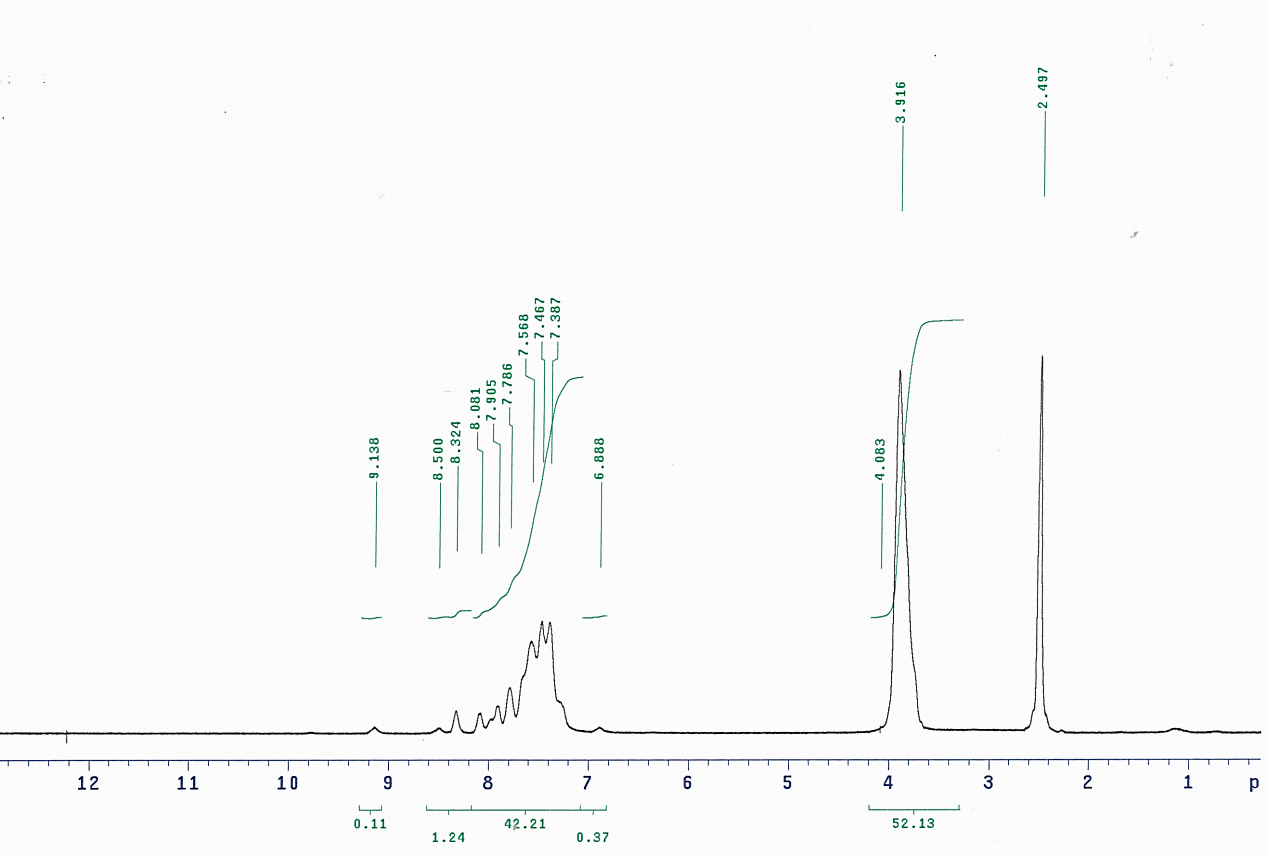


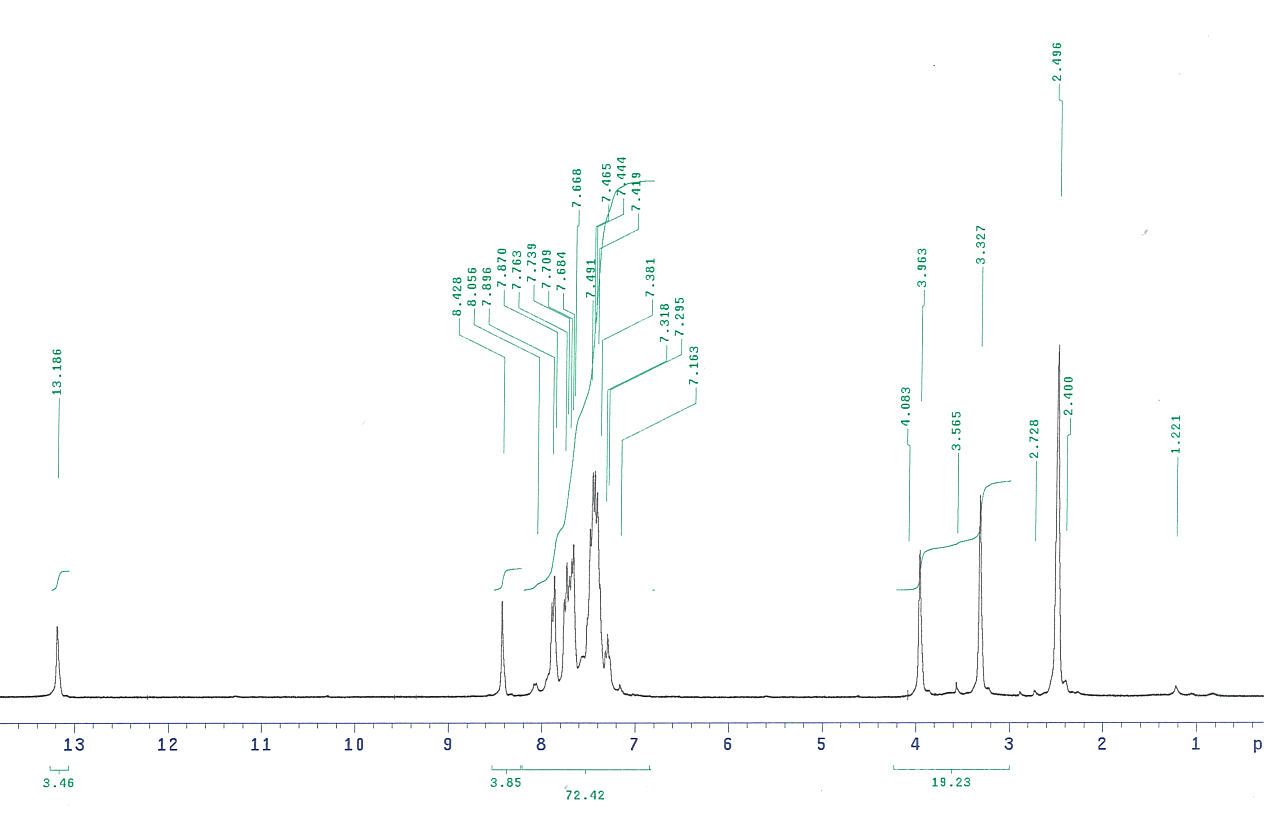


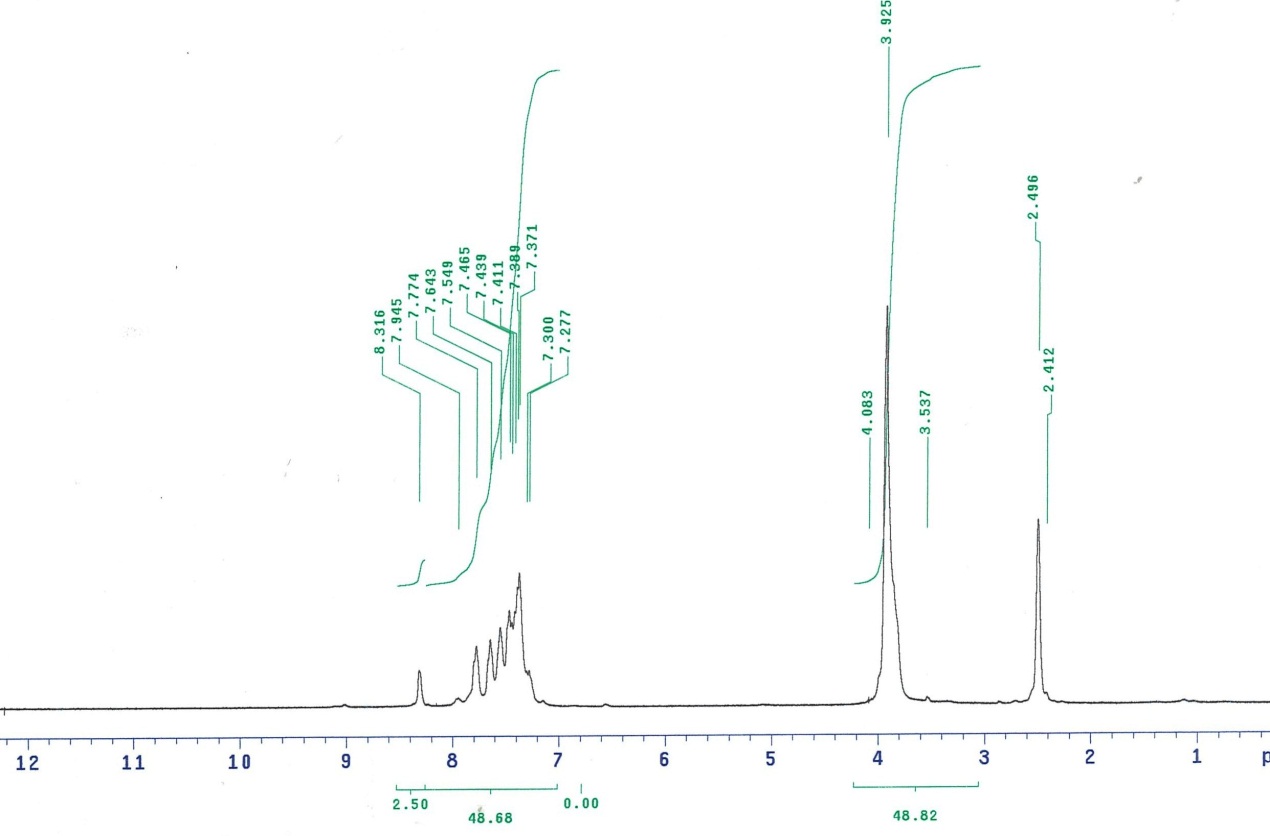


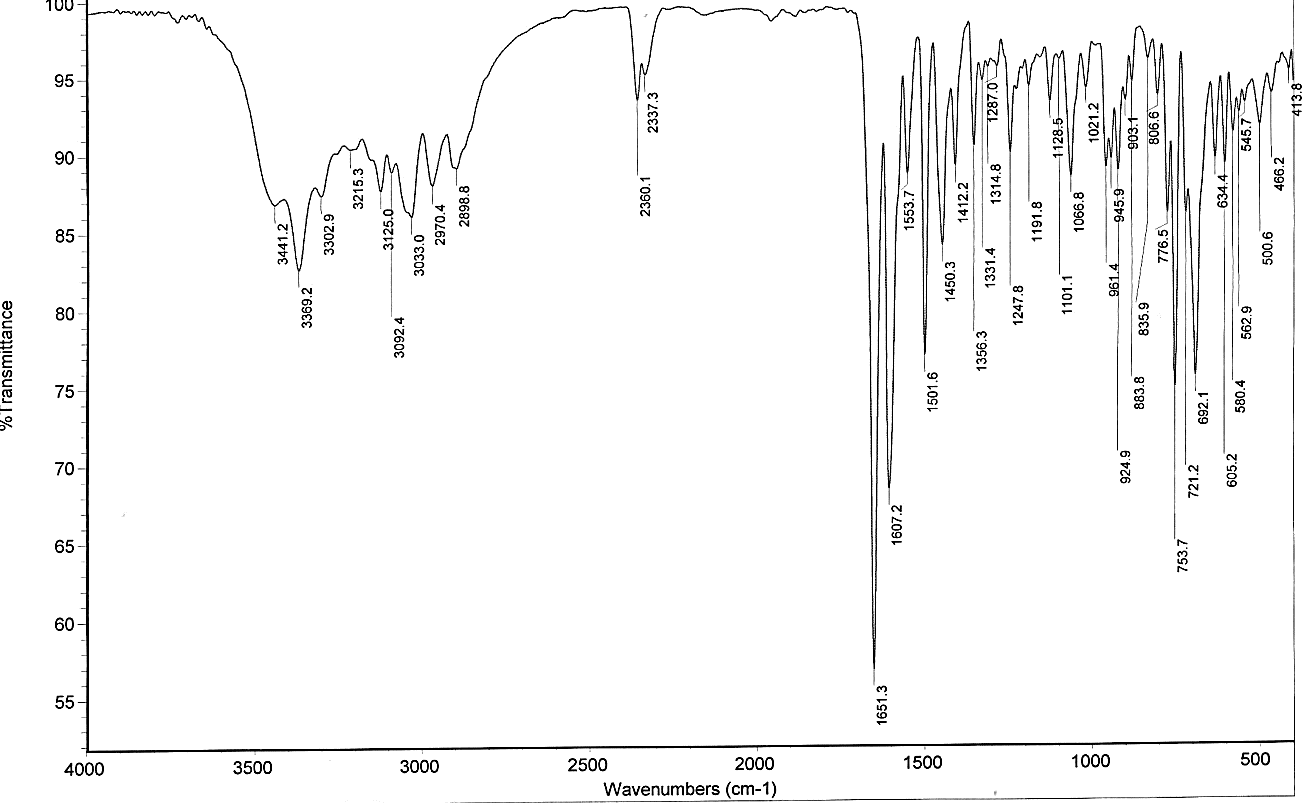


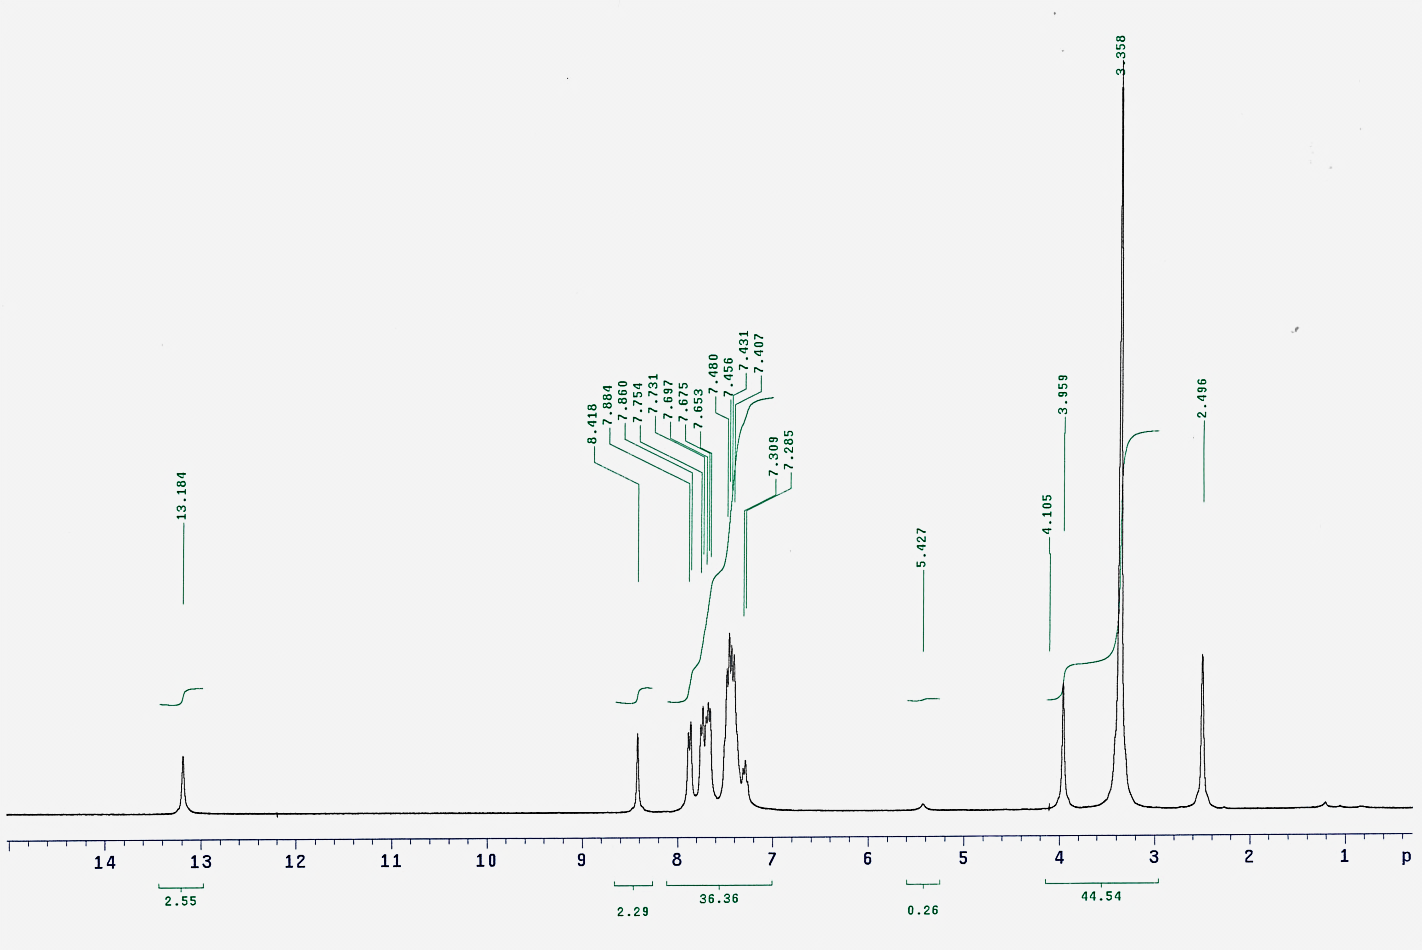


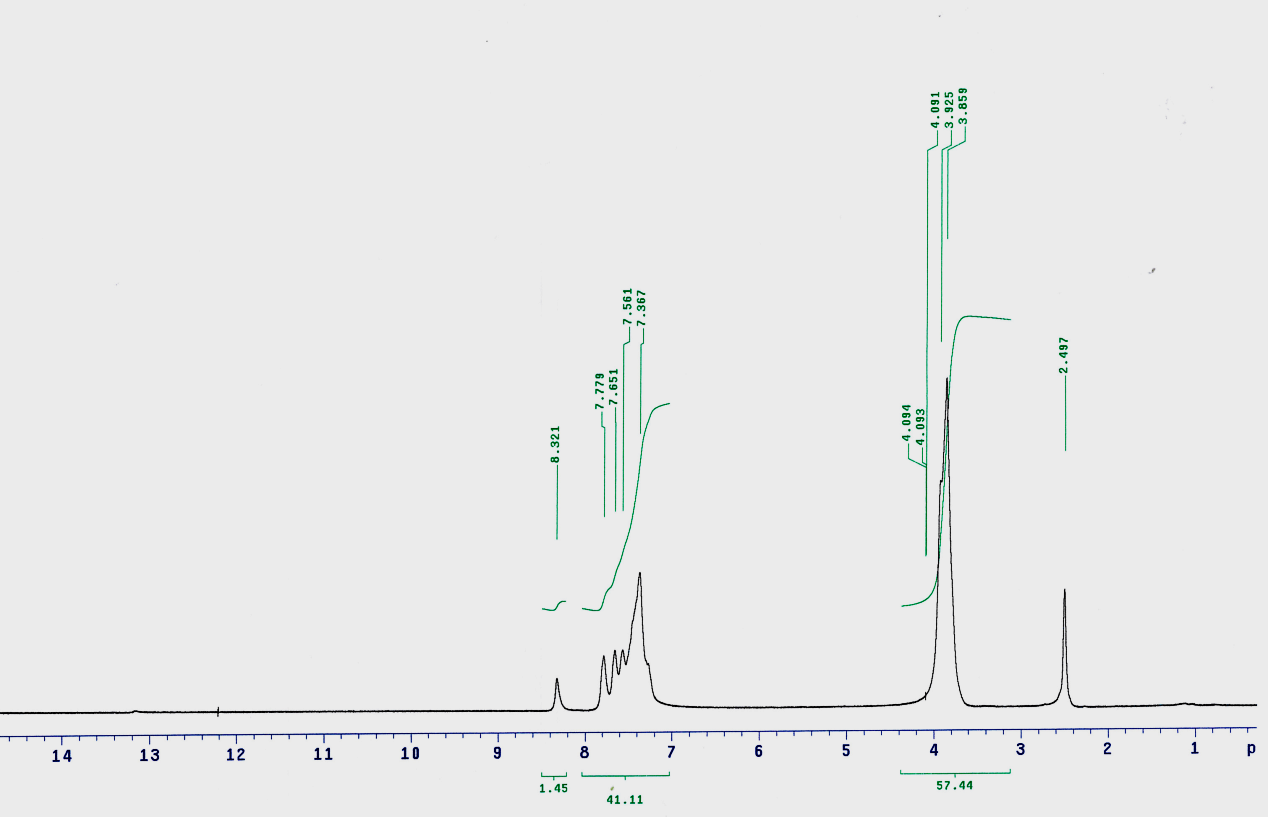


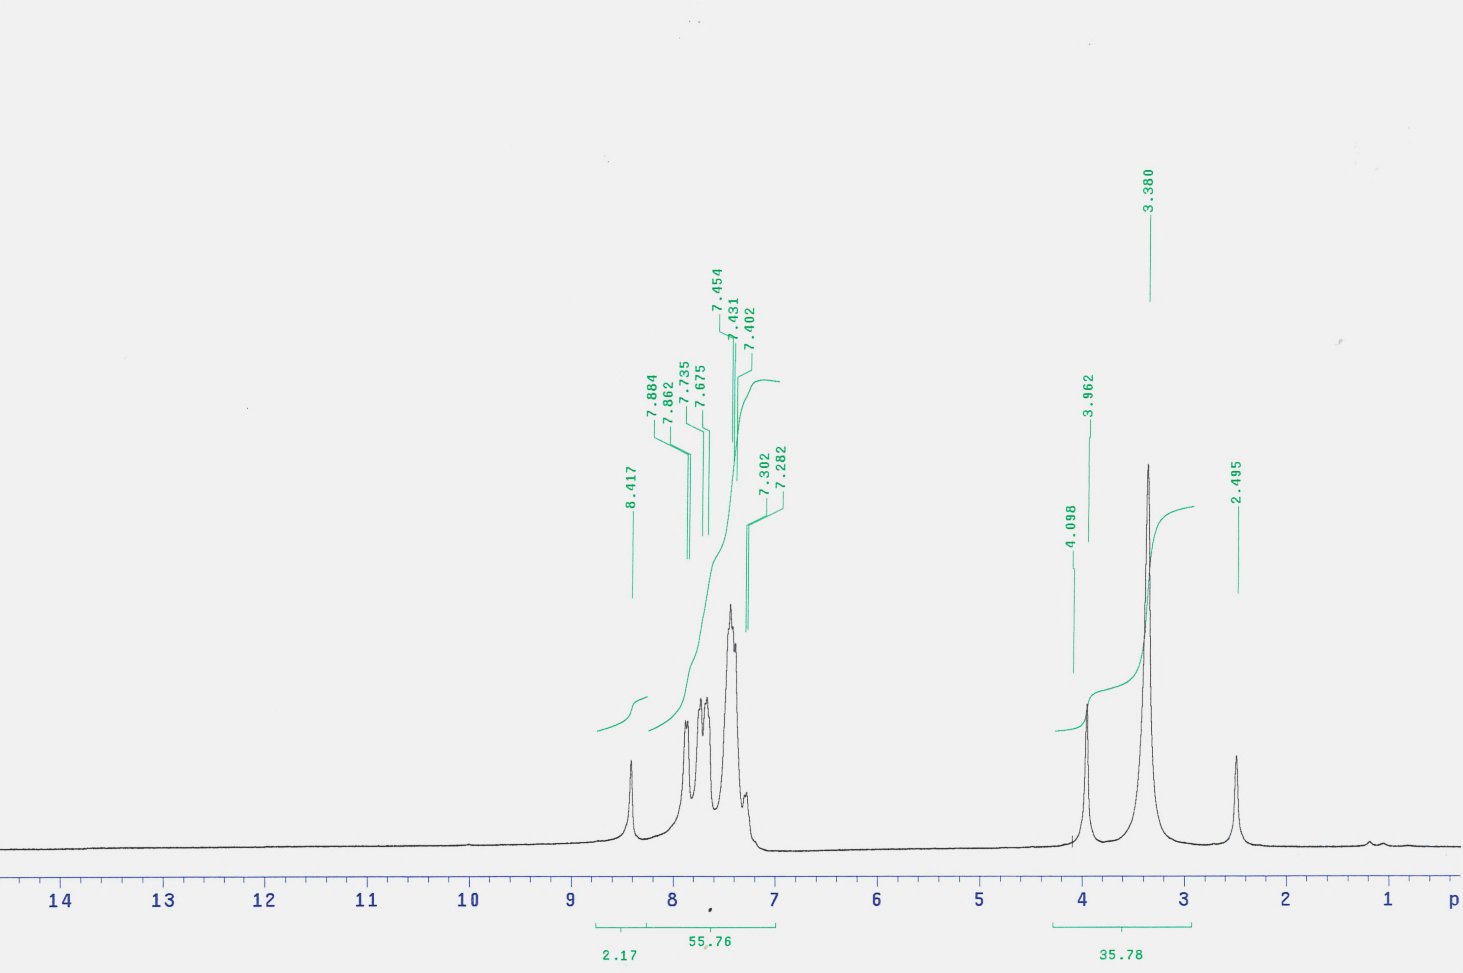


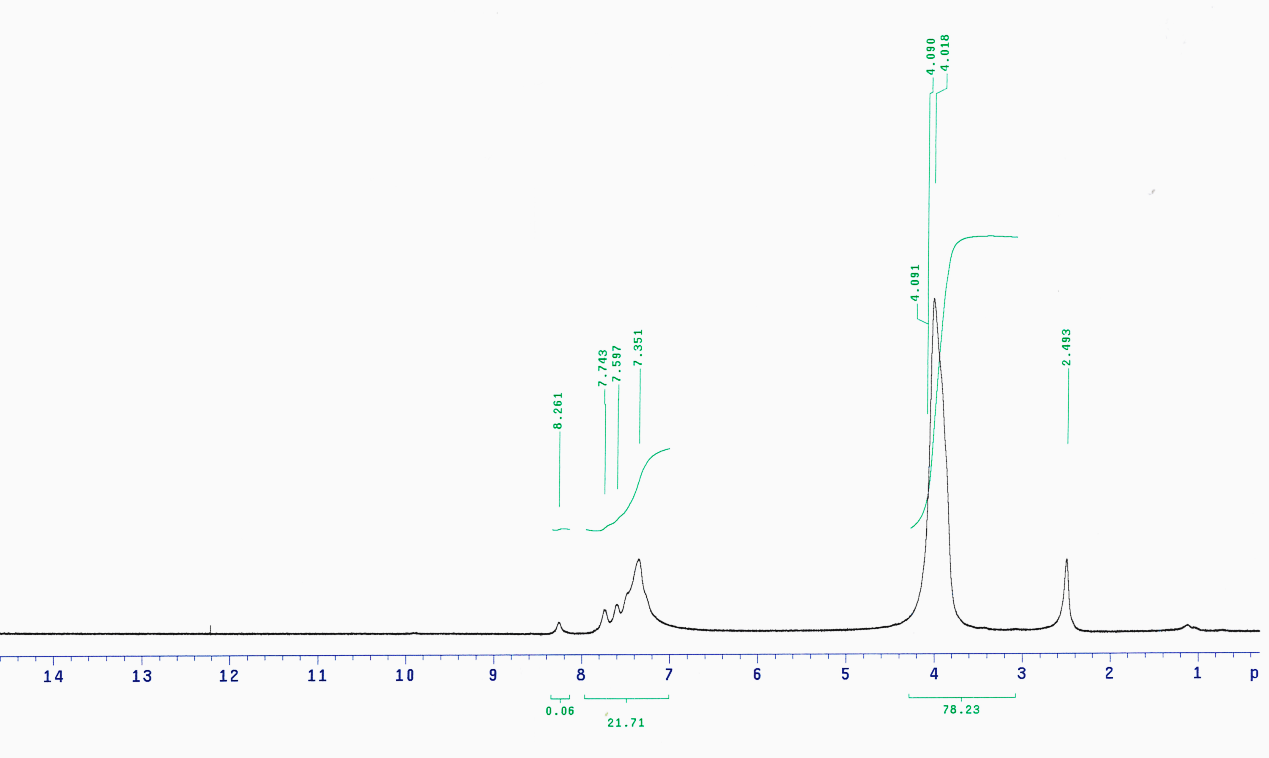


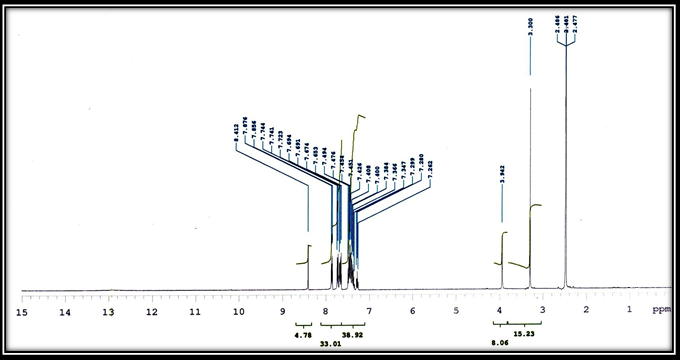


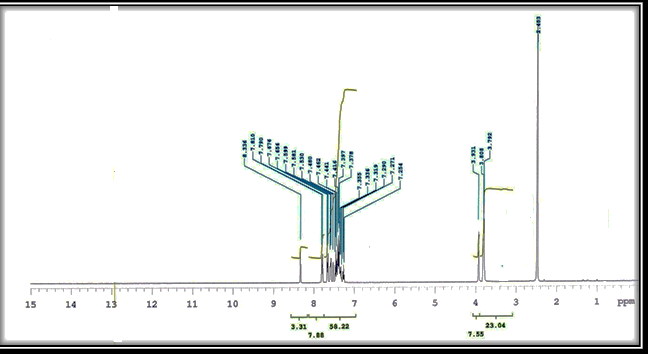


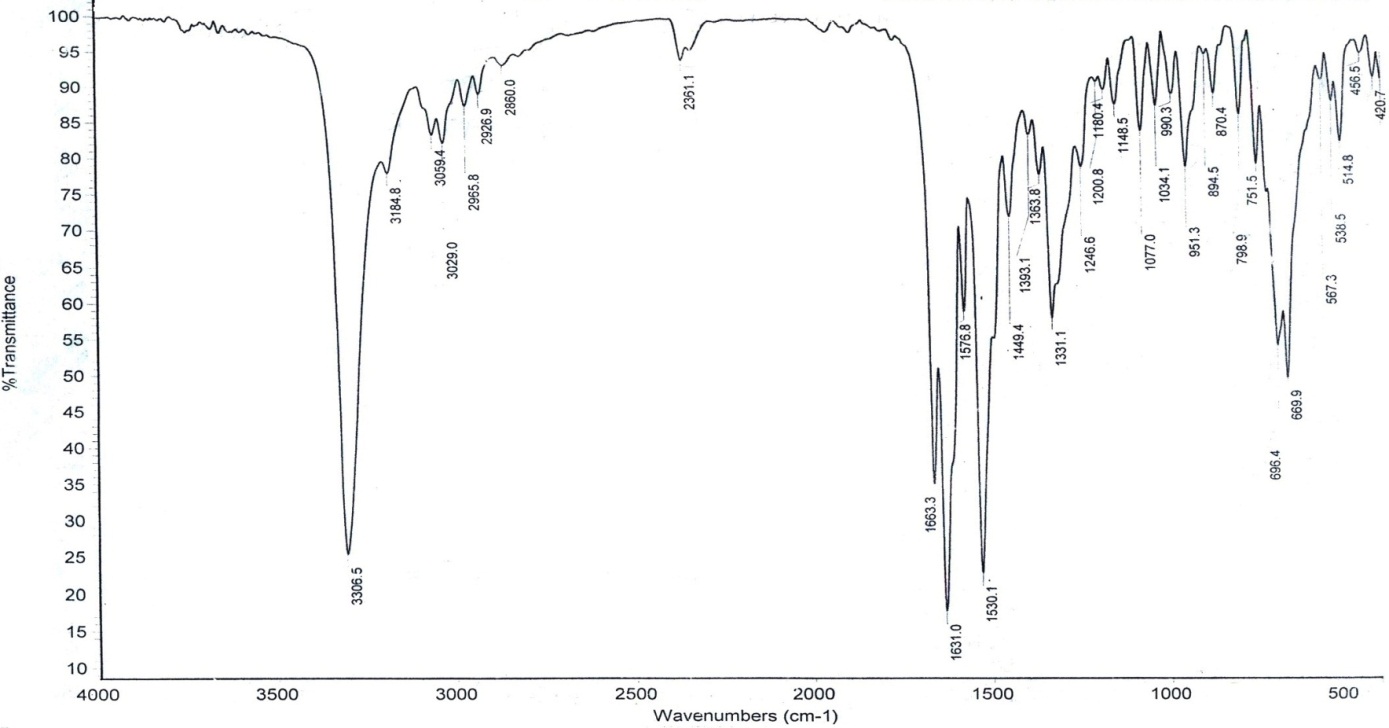


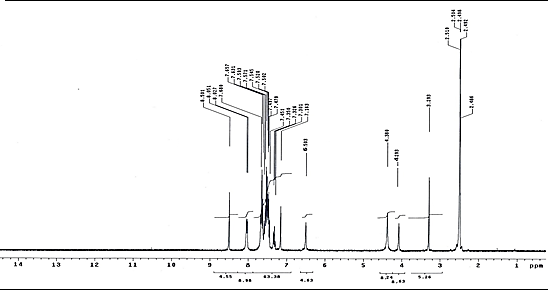


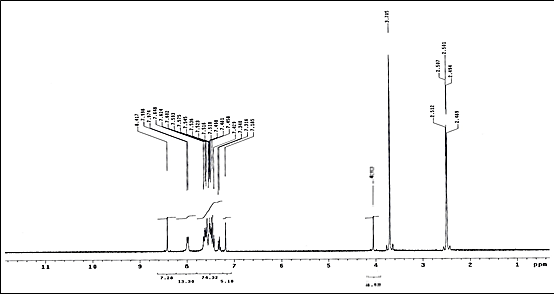


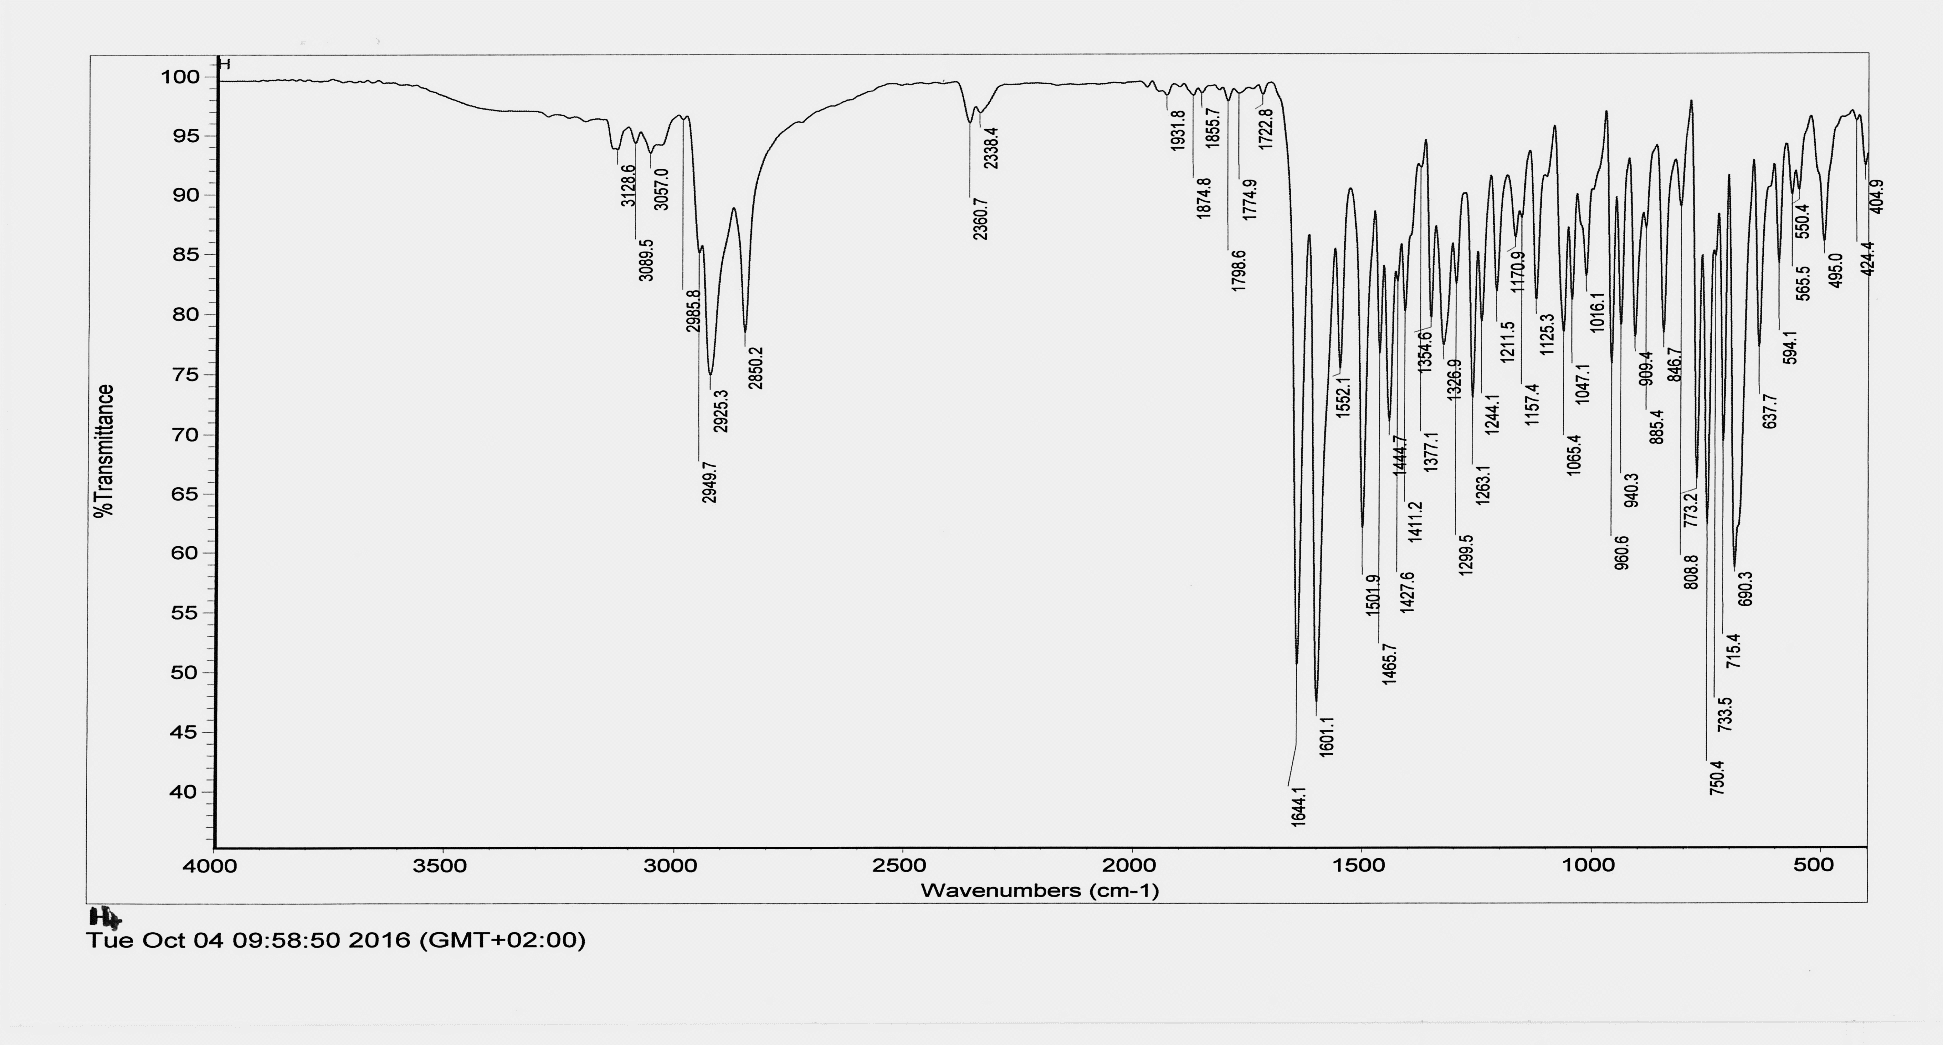


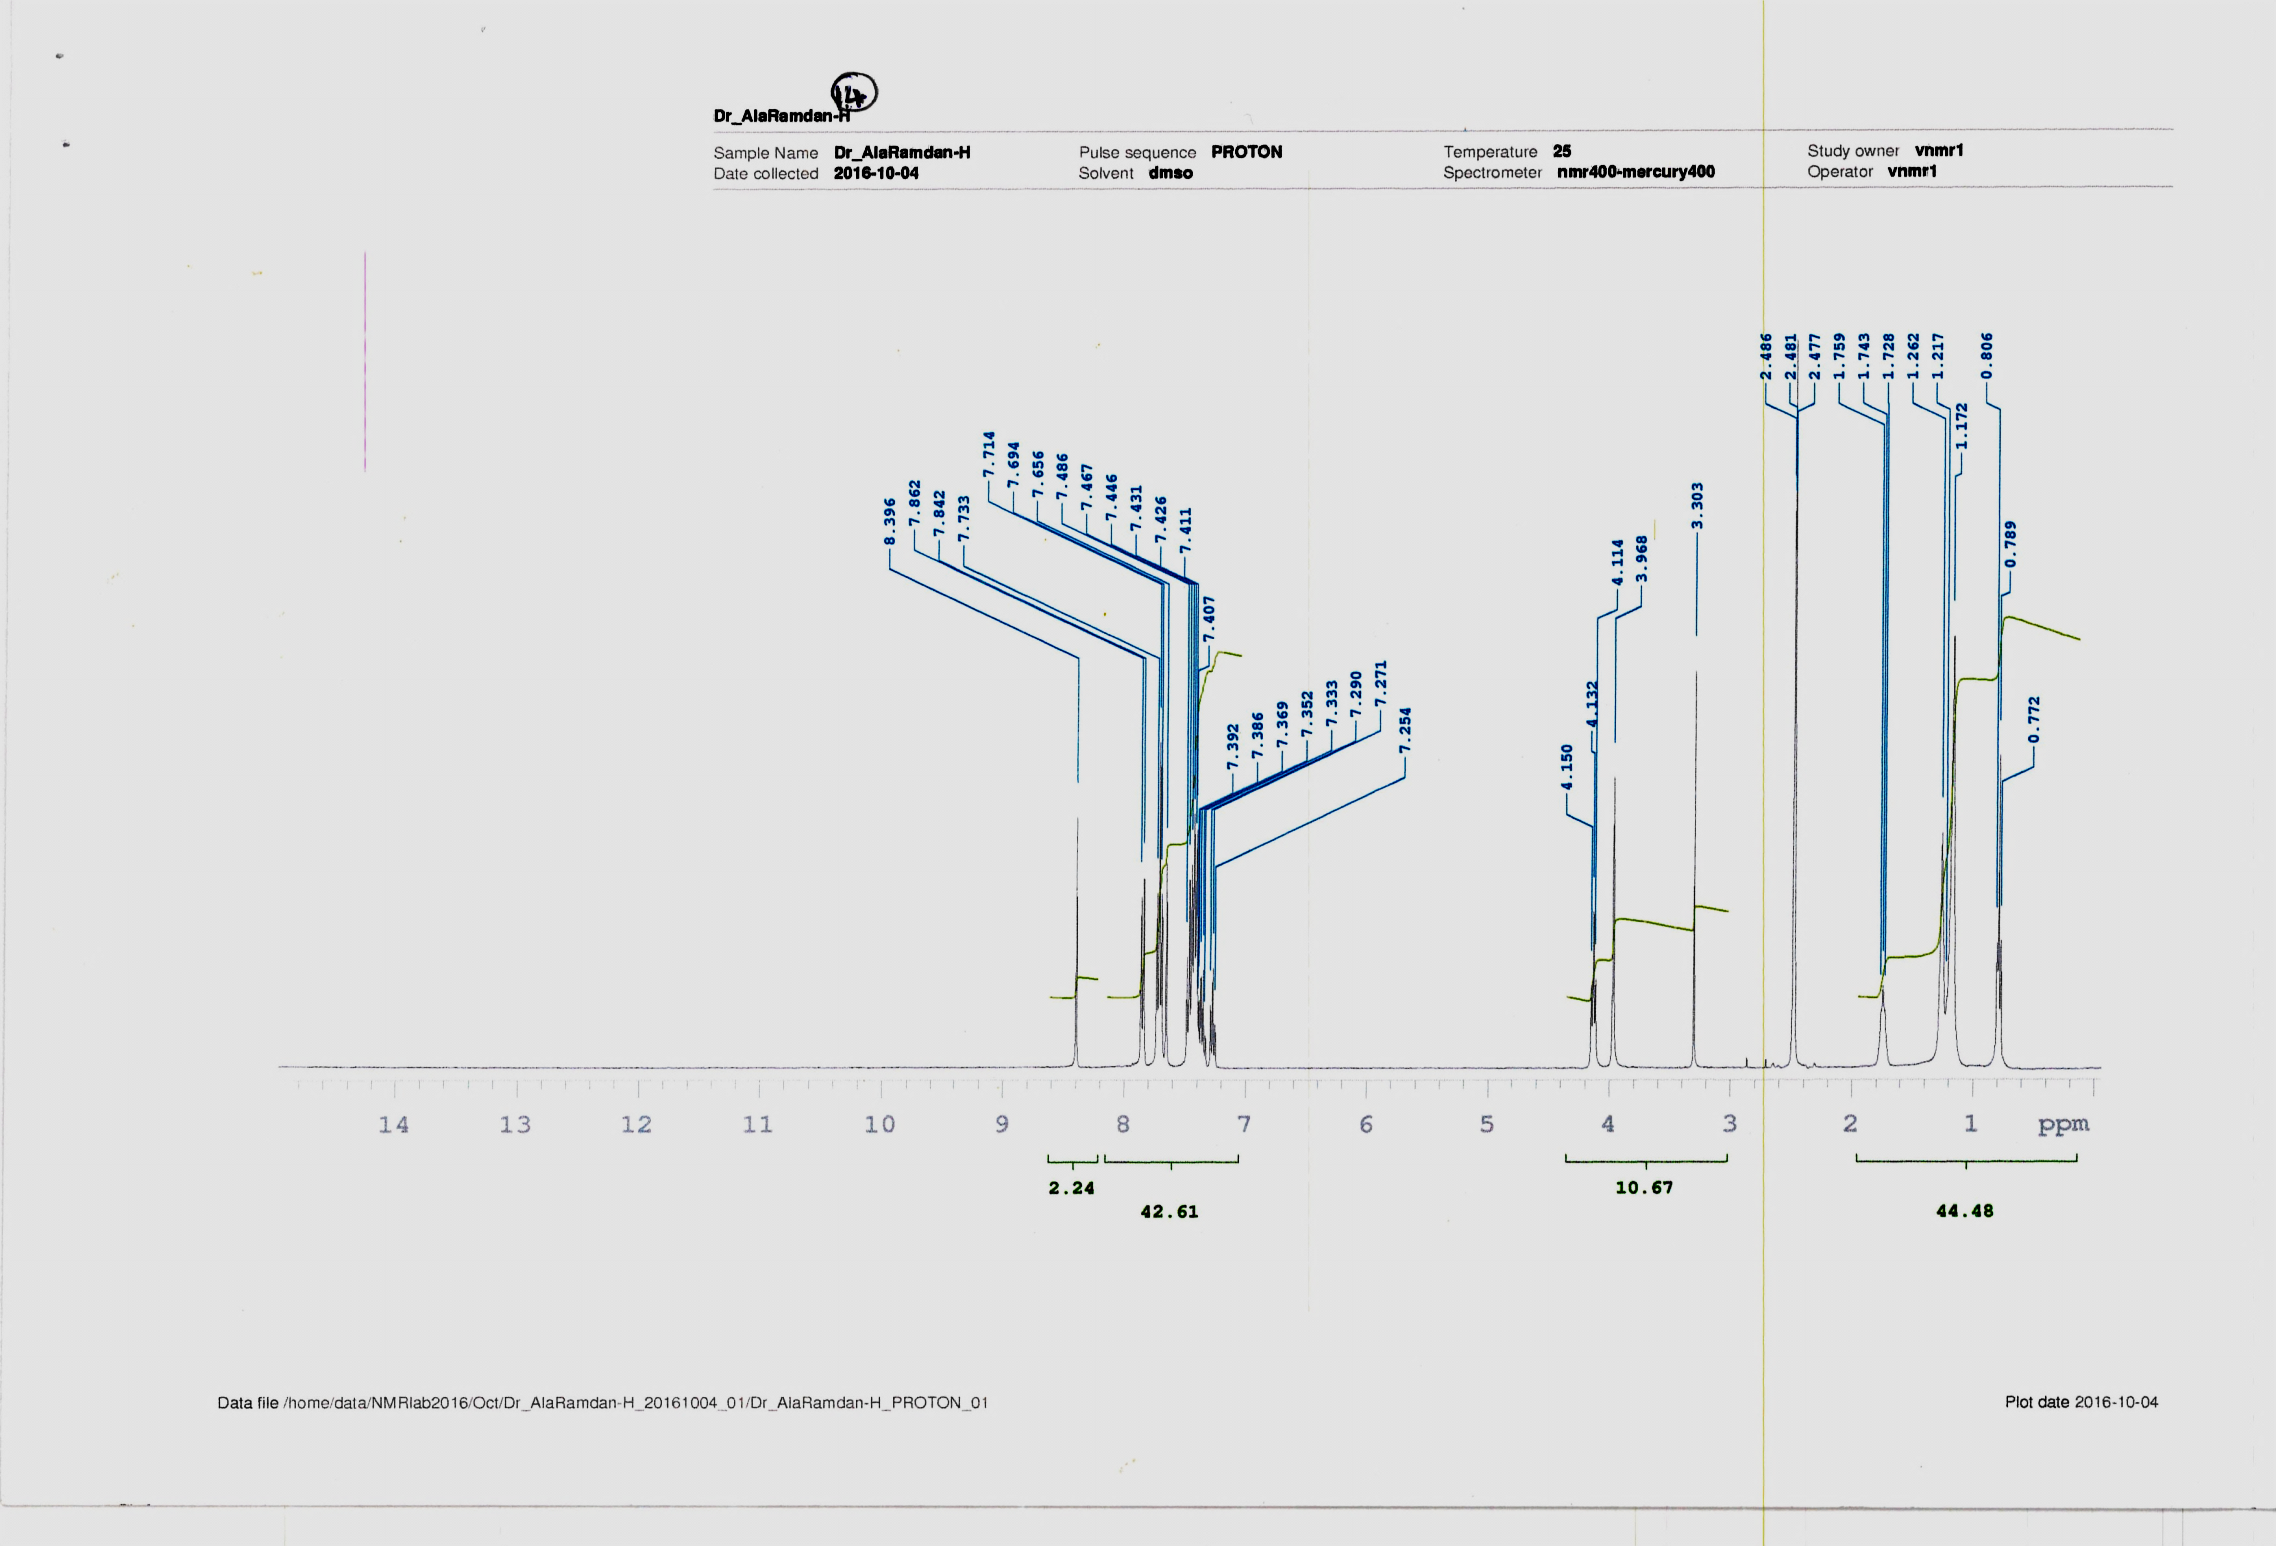


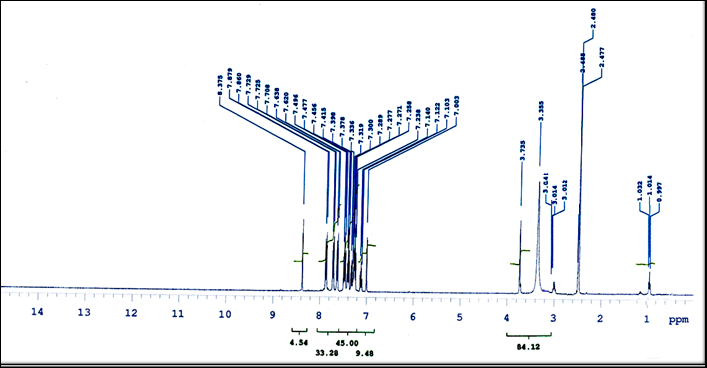


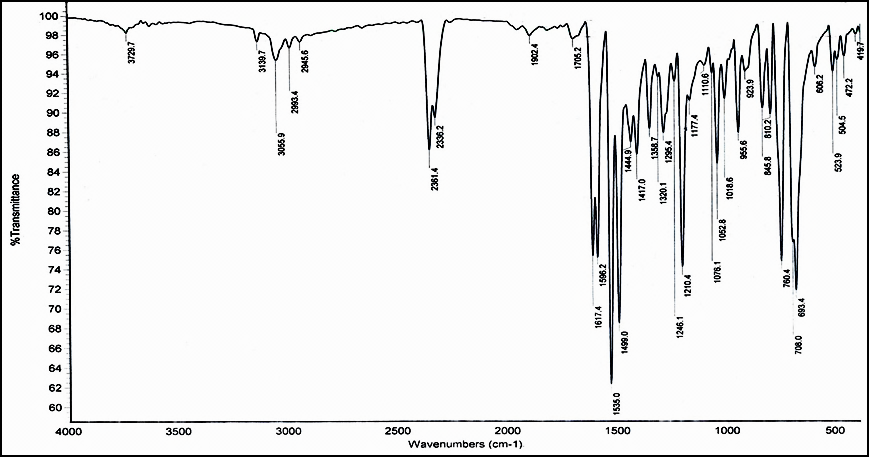


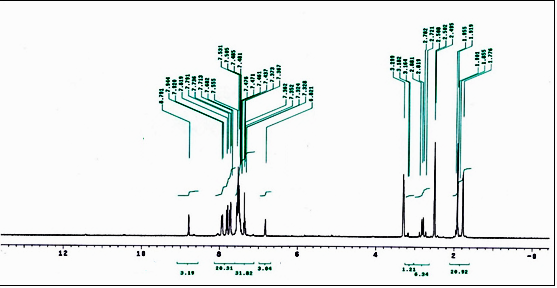


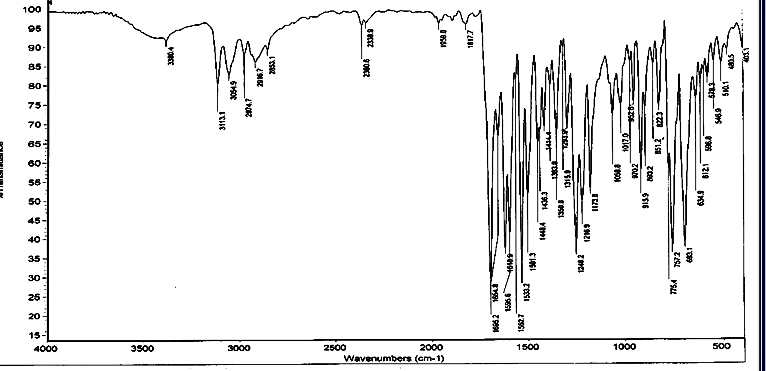


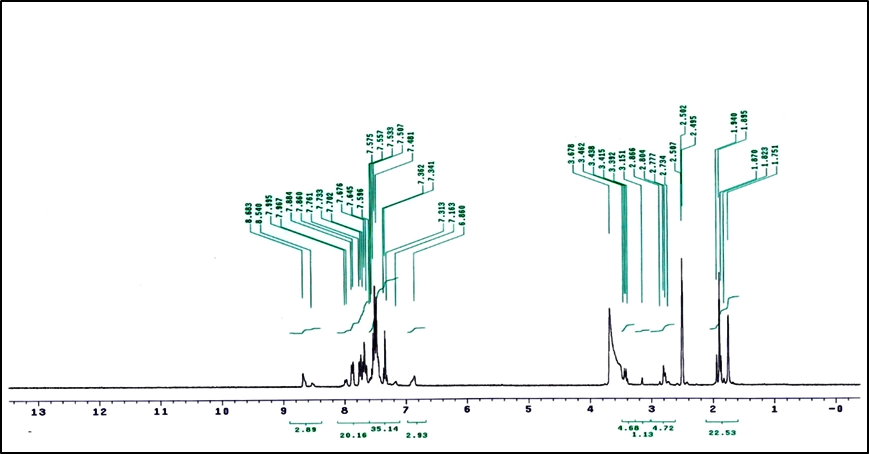

Supplement: Supplementary file 1 [file 13209005]
